# Supplementary material for: Analysis of Cell–Cell Communication by Single-Nuclei RNA Sequencing Identifies AHR-Mediated Induction of NRG-ERBB Signaling
Source: MDPI journal article supplement (doi:10.3390/receptors2020009), 2023-05-11
Supplement: s1 [file s1]

Archive with 1 entries (1 files):
- receptors-2208508-supplementary-proof.pdf
