# Supplementary material for: Analysis of Cell–Cell Communication by Single-Nuclei RNA Sequencing Identifies AHR-Mediated Induction of NRG-ERBB Signaling
Source: MDPI journal article supplement (doi:10.3390/receptors2020009), 2023-05-11
Supplement: s1 [file s1 › receptors-2208508-supplementary-proof.pdf]

## SUPPLEMENTAL FIGURES

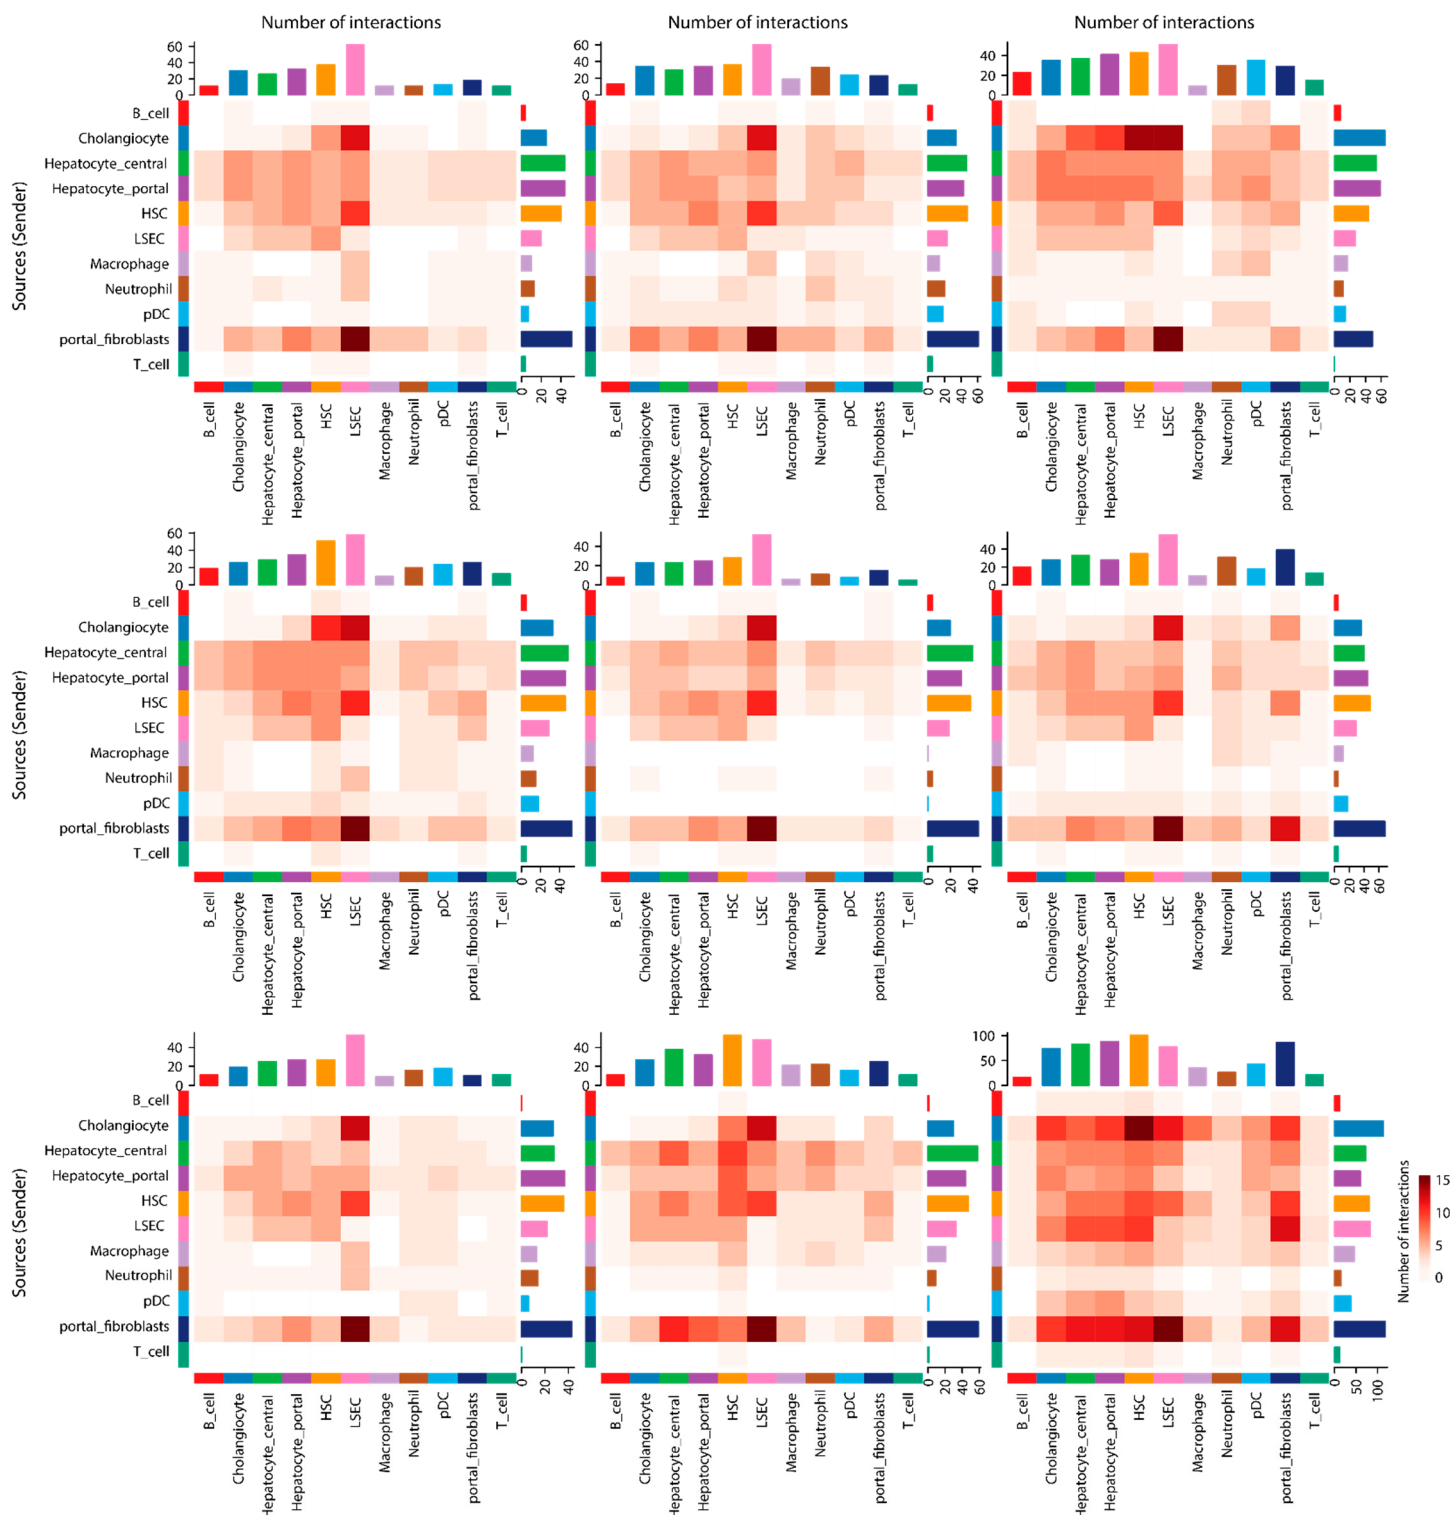

**Figure S1. The number of incoming and outgoing inferred interactions across cell types following TCDD treatment.**

Hepatic snRNAseq data from male mice gavaged with sesame oil or 0.01 – 30 ug/kg TCDD every 4 days for 28 days was analyzed for cell-cell interactions via secreted factors using CellChat. The number of inferred interactions is shown as outgoing and incoming across all cell types.

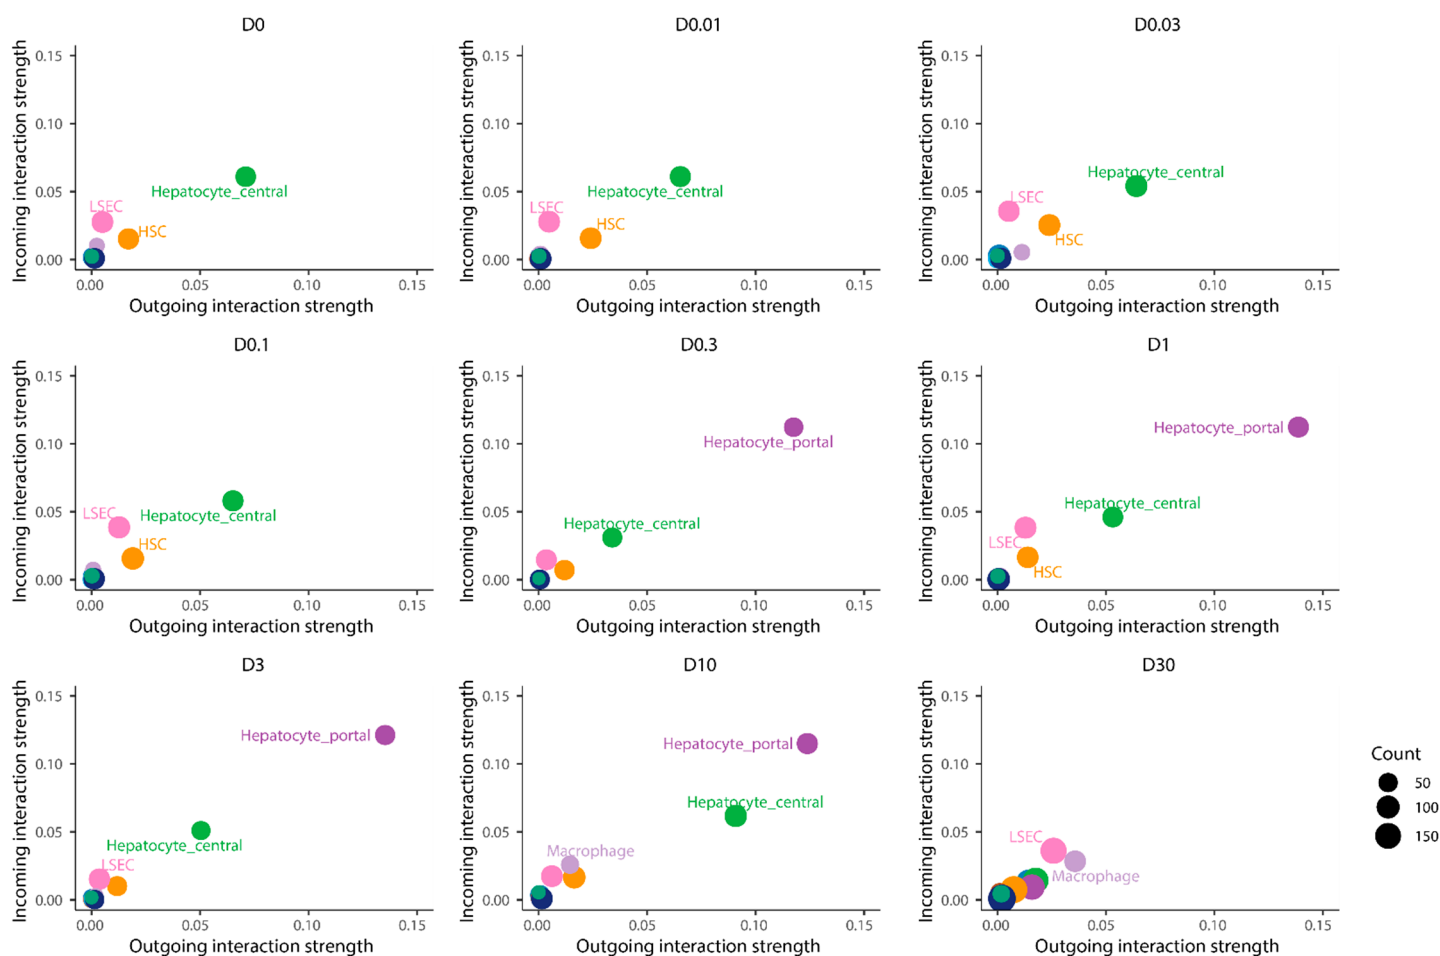

**Figure S2. Incoming and outgoing interaction strength across cell types and TCDD dose.** Hepatic snRNAseq data from male mice gavaged with sesame oil or 0.01 – 30  $\mu\text{g/kg}$  TCDD every 4 days for 28 days was analyzed for cell-cell interactions using CellChat. Interaction strengths were estimated for outgoing and incoming inferred interactions across all cell types and are shown for each dose group showing dose-dependent changes in contributions of cell types to cell-cell interactions following treatment with TCDD.

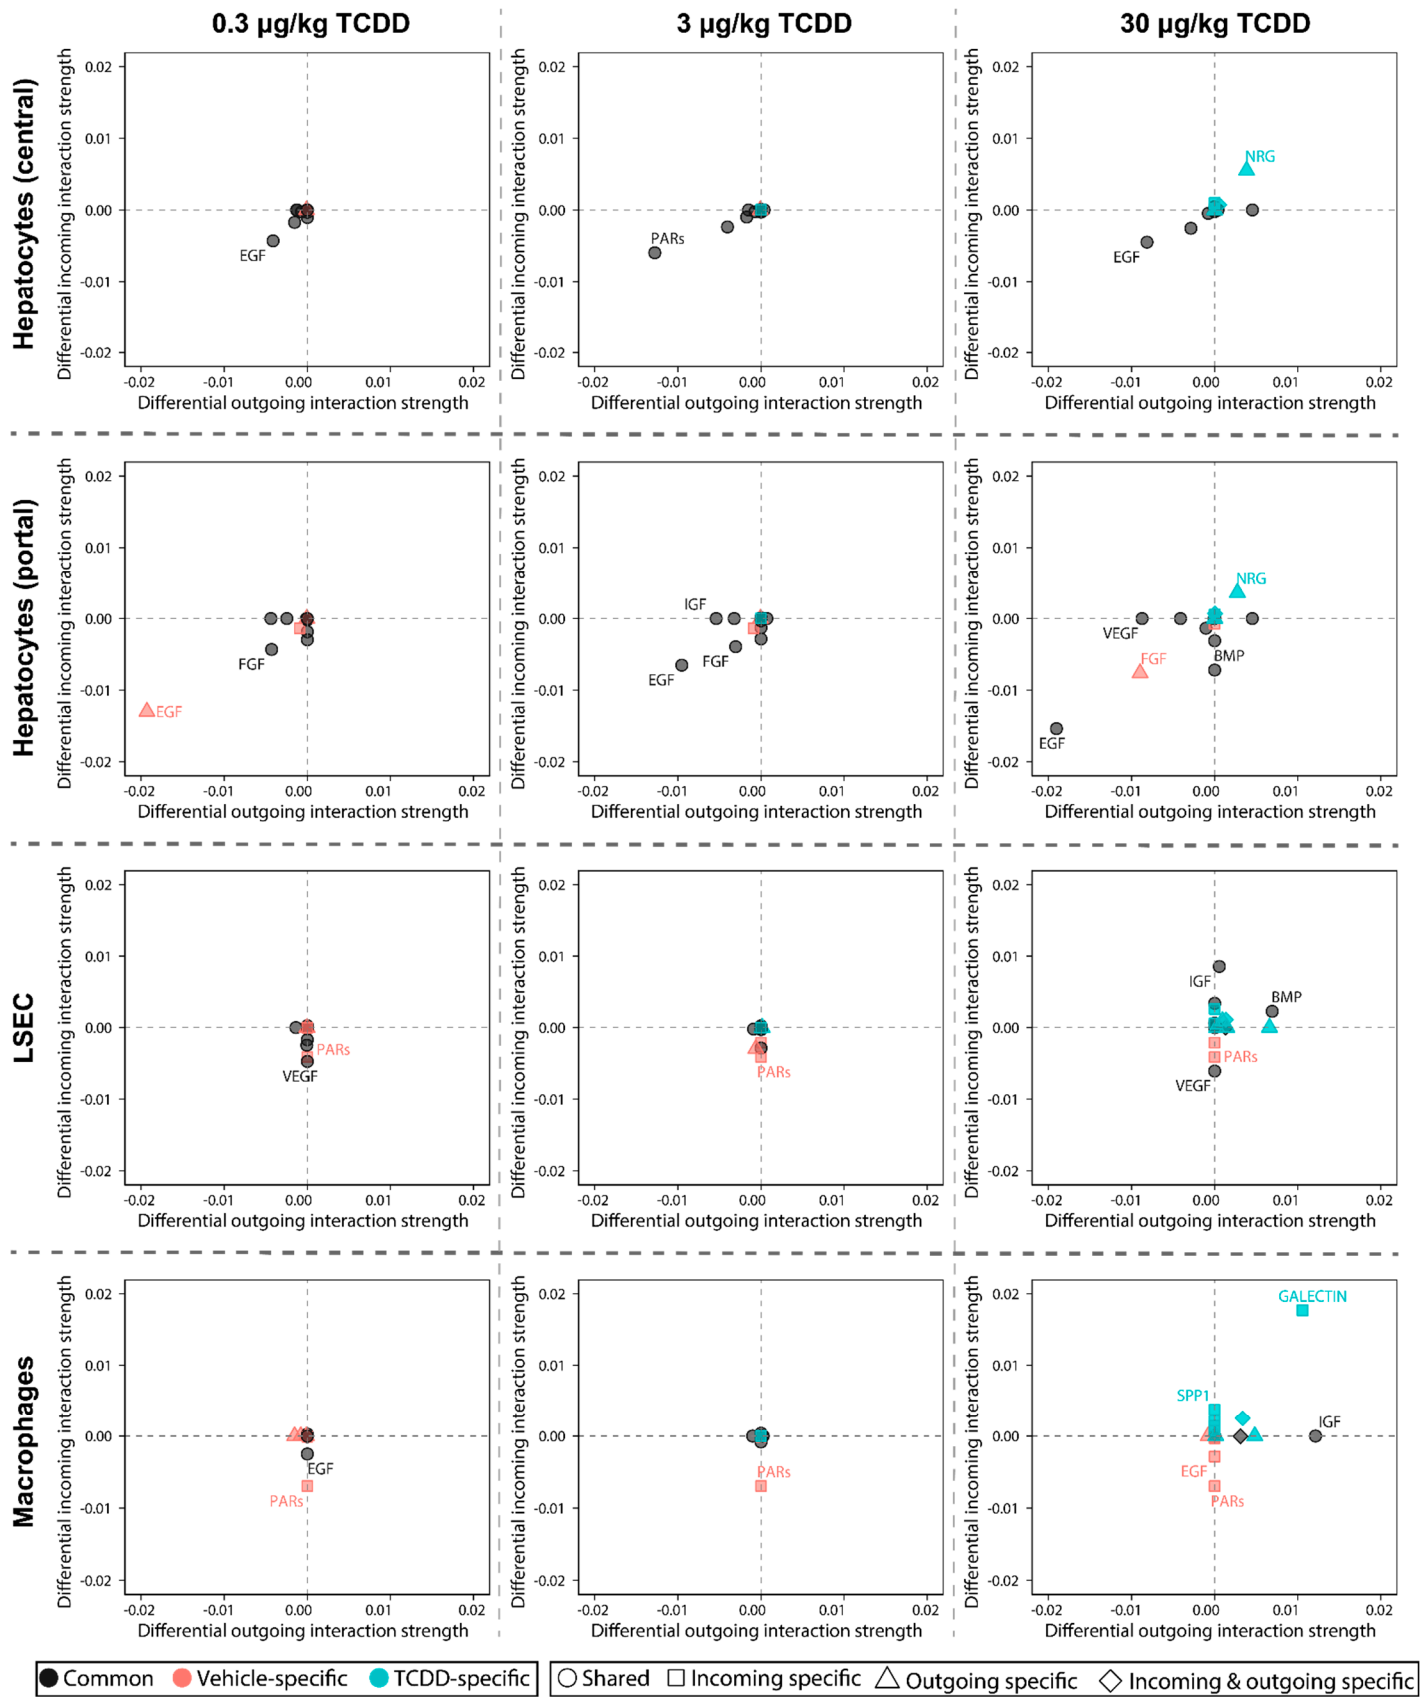

**Figure S3. Changes in incoming and outgoing signaling across portal and central hepatocytes, LSECs and macrophages.** The interaction strength between vehicle and 30 µg/kg TCDD dose groups were compared for each signaling pathway in each cell type.

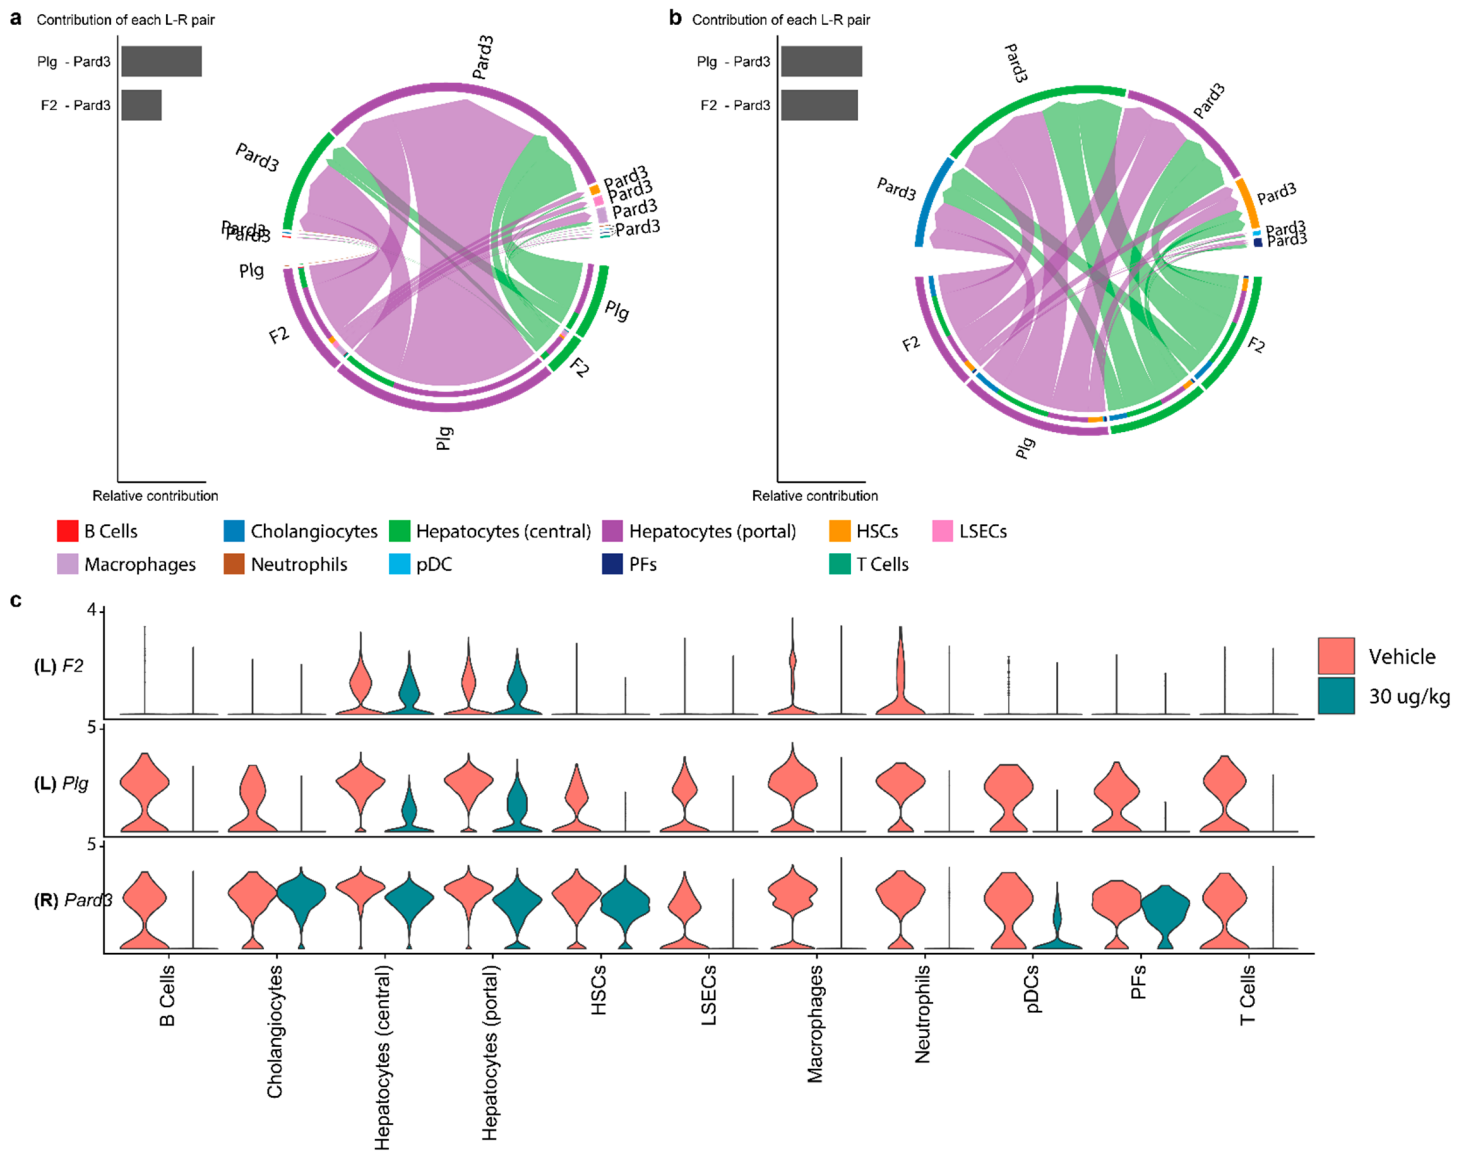

**Figure S4. Contributions of individual PARs ligand-receptor pairs.** Inferred PARs signaling interactions between cells were examined for specific ligand-receptor (L-R) pair interactions in (a) vehicle and (b) 30  $\mu\text{g/kg}$  TCDD treated groups. Chord plots show the ligand expressed by a specific cell type (outer lower ring), the cell type receiving the L (inner lower ring), and the cell type expressing the R (outer upper ring). Color represents the L-R pair interactions by cell type. (c) Expression levels of contributing ligands (L) and receptors (R) in the snRNAseq dataset are shown for each cell type in the vehicle and 30  $\mu\text{g/kg}$  TCDD dose groups.

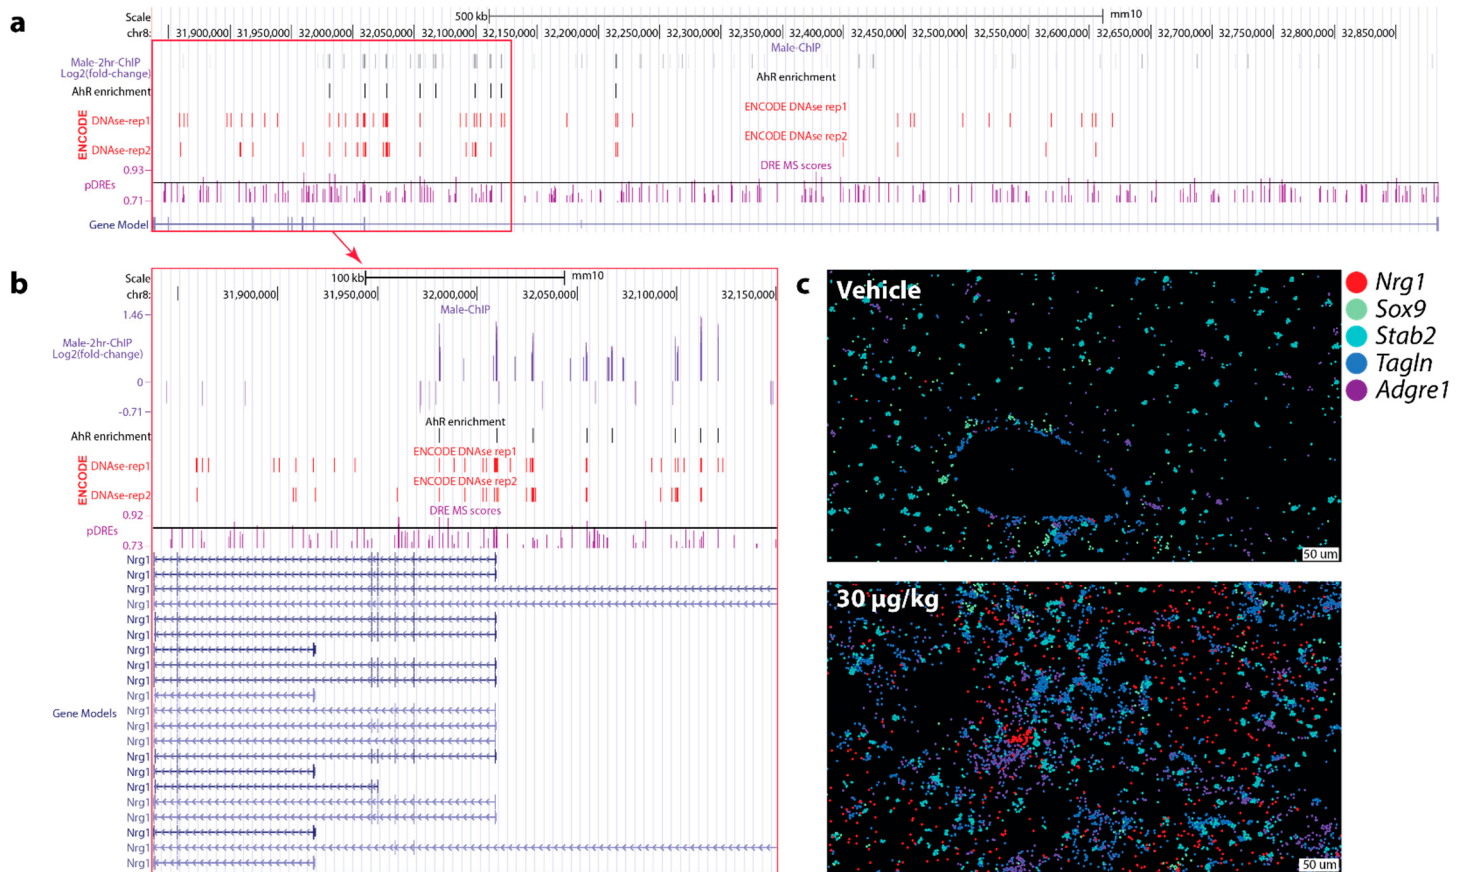

**Figure S5. *Nrg1* induction by TCDD-mediated AHR activation.** (a) *Nrg1* region of the mm10 mouse genome shown in UCSC Genome Browser (<https://genome.ucsc.edu/>) and (b) magnification of the *Nrg1* region showing the most binding of AHR by ChIP-seq and multiple *Nrg1* isoform start sites. Tracks from top to bottom show AHR enrichment compared to IgG control determined by ChIP-seq (GSE109865); Regions demonstrating significant AHR enrichment (adjusted p-value  $\leq 0.05$ ); two replicates for DNase hypersensitivity data showing accessible chromatin regions determined by the Encyclopedia of DNA elements (ENCODE) for livers of adult (8 weeks) male mice (GSM1014195); calculated matrix similarity scores (MSS) for putative dioxin response elements (pDREs; <https://doi.org/10.7910/DVN/JASCVZ/HX9XWZ>) with a line delineating a significance threshold of 0.856; and *Nrg1* gene models. (c) Spatially resolved *Nrg1* expression (red) as well as cell types markers *Sox9* (green, cholangiocytes), *Stab2* (aqua, LSEC), *Tagln* (blue, HSC), and *Adgre1* (purple, macrophages) was determined using the Resolve Biosciences Molecular Cartography platform as previously described (GSE206294; SCP1875) [19].
